# Supplementary material
Source: ML conference proceedings conference paper supplement (https://openaccess.thecvf.com/content/WACV2023/html/Dokania_IDD-3D_Indian_Driving_WACV_2023_paper.html)

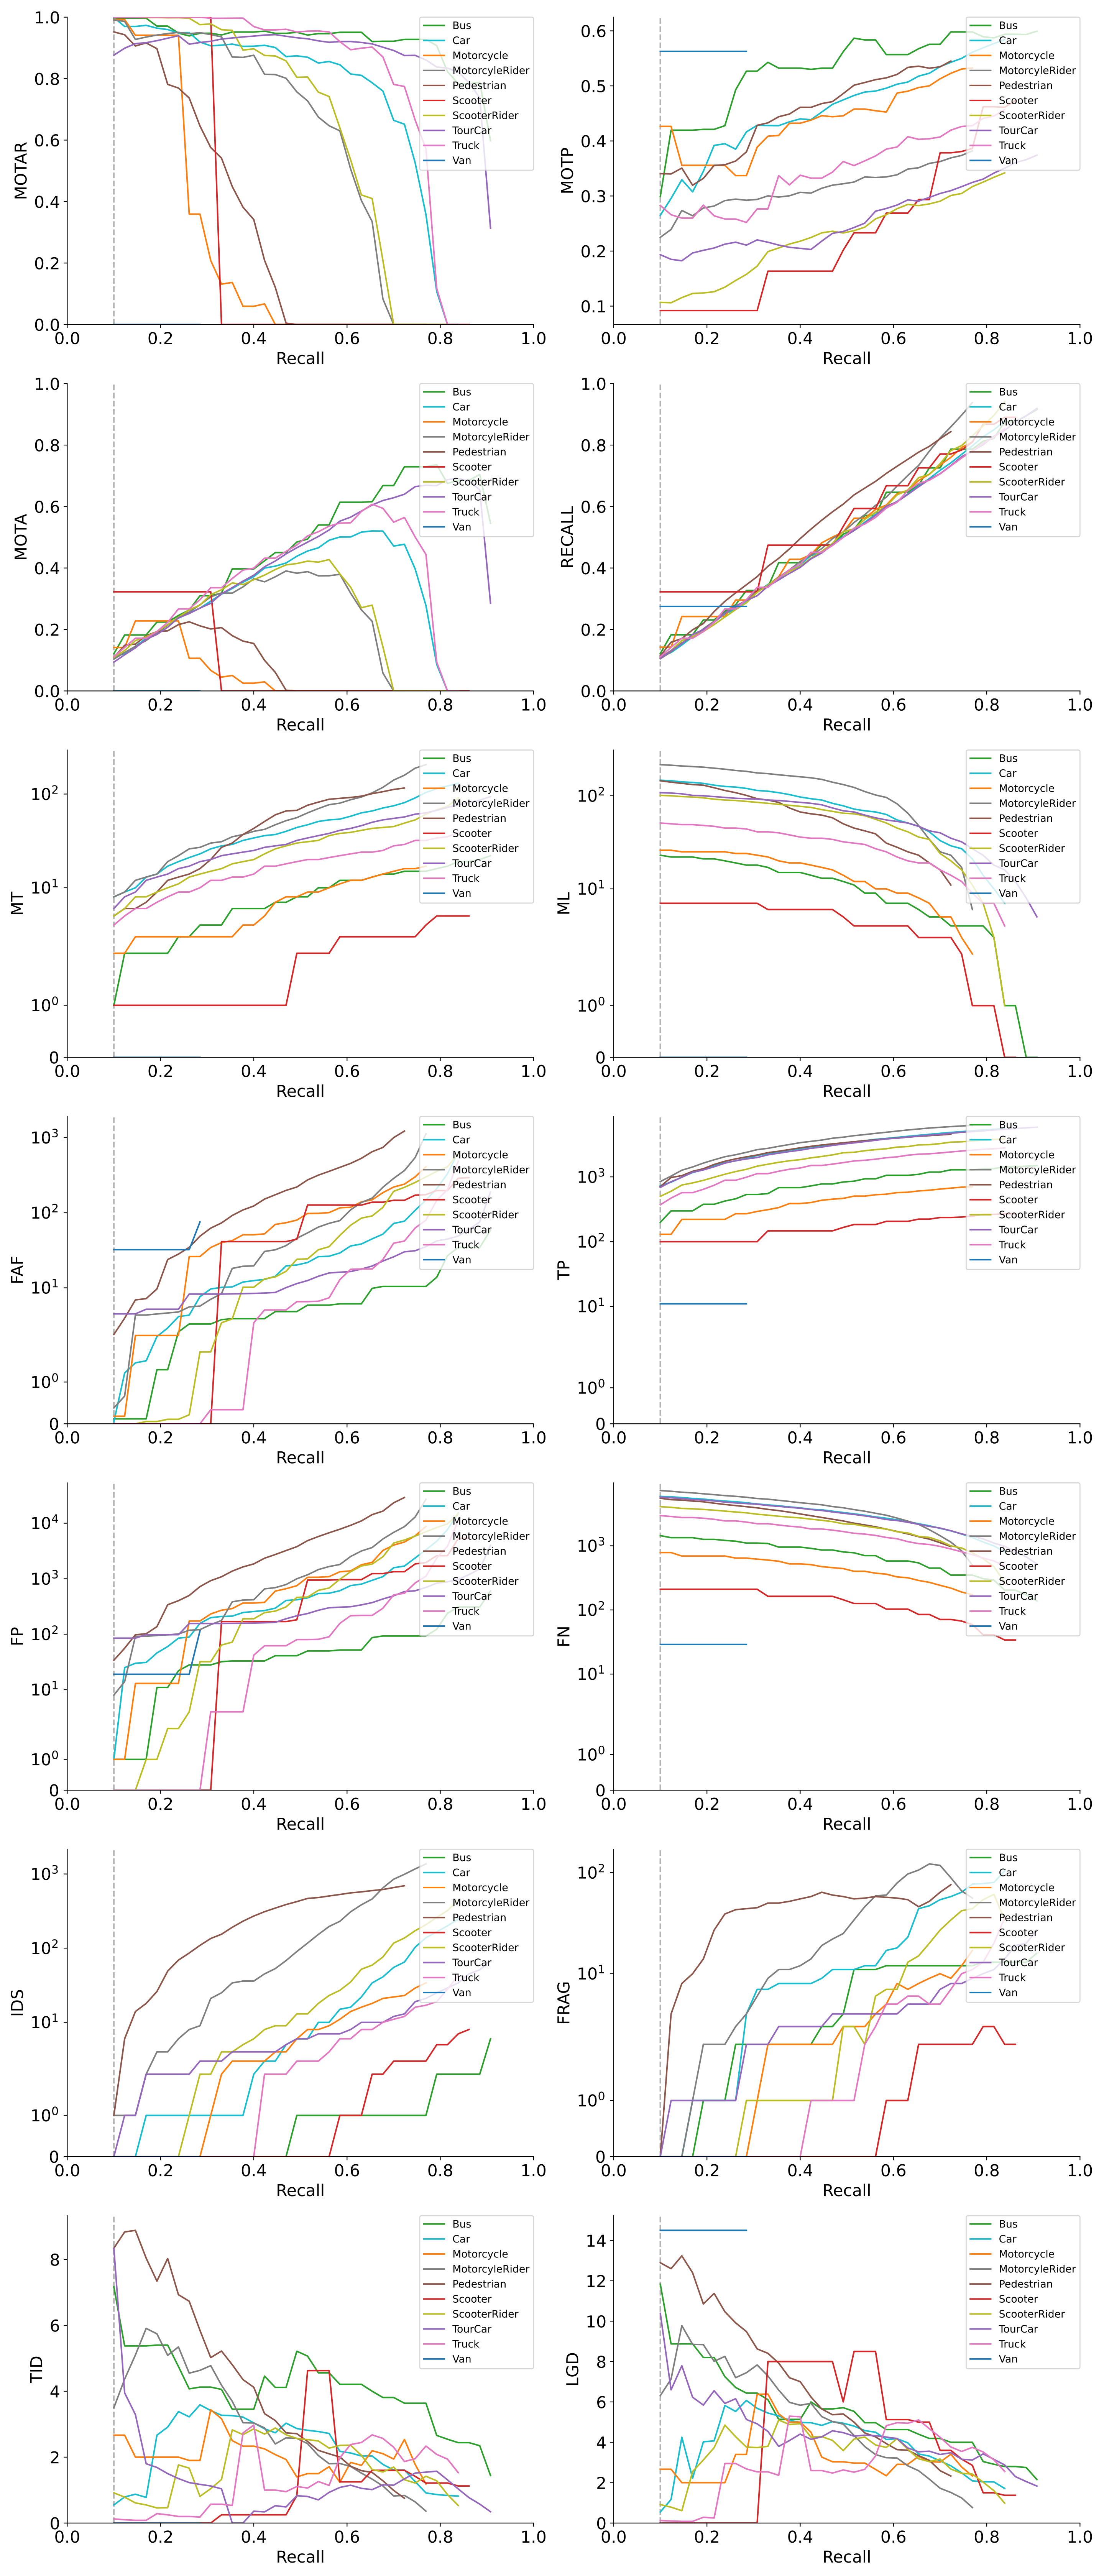

Supplement: Supplementary file 1 [file Dokania_IDD-3D_Indian_Driving_WACV_2023_supplemental.zip]

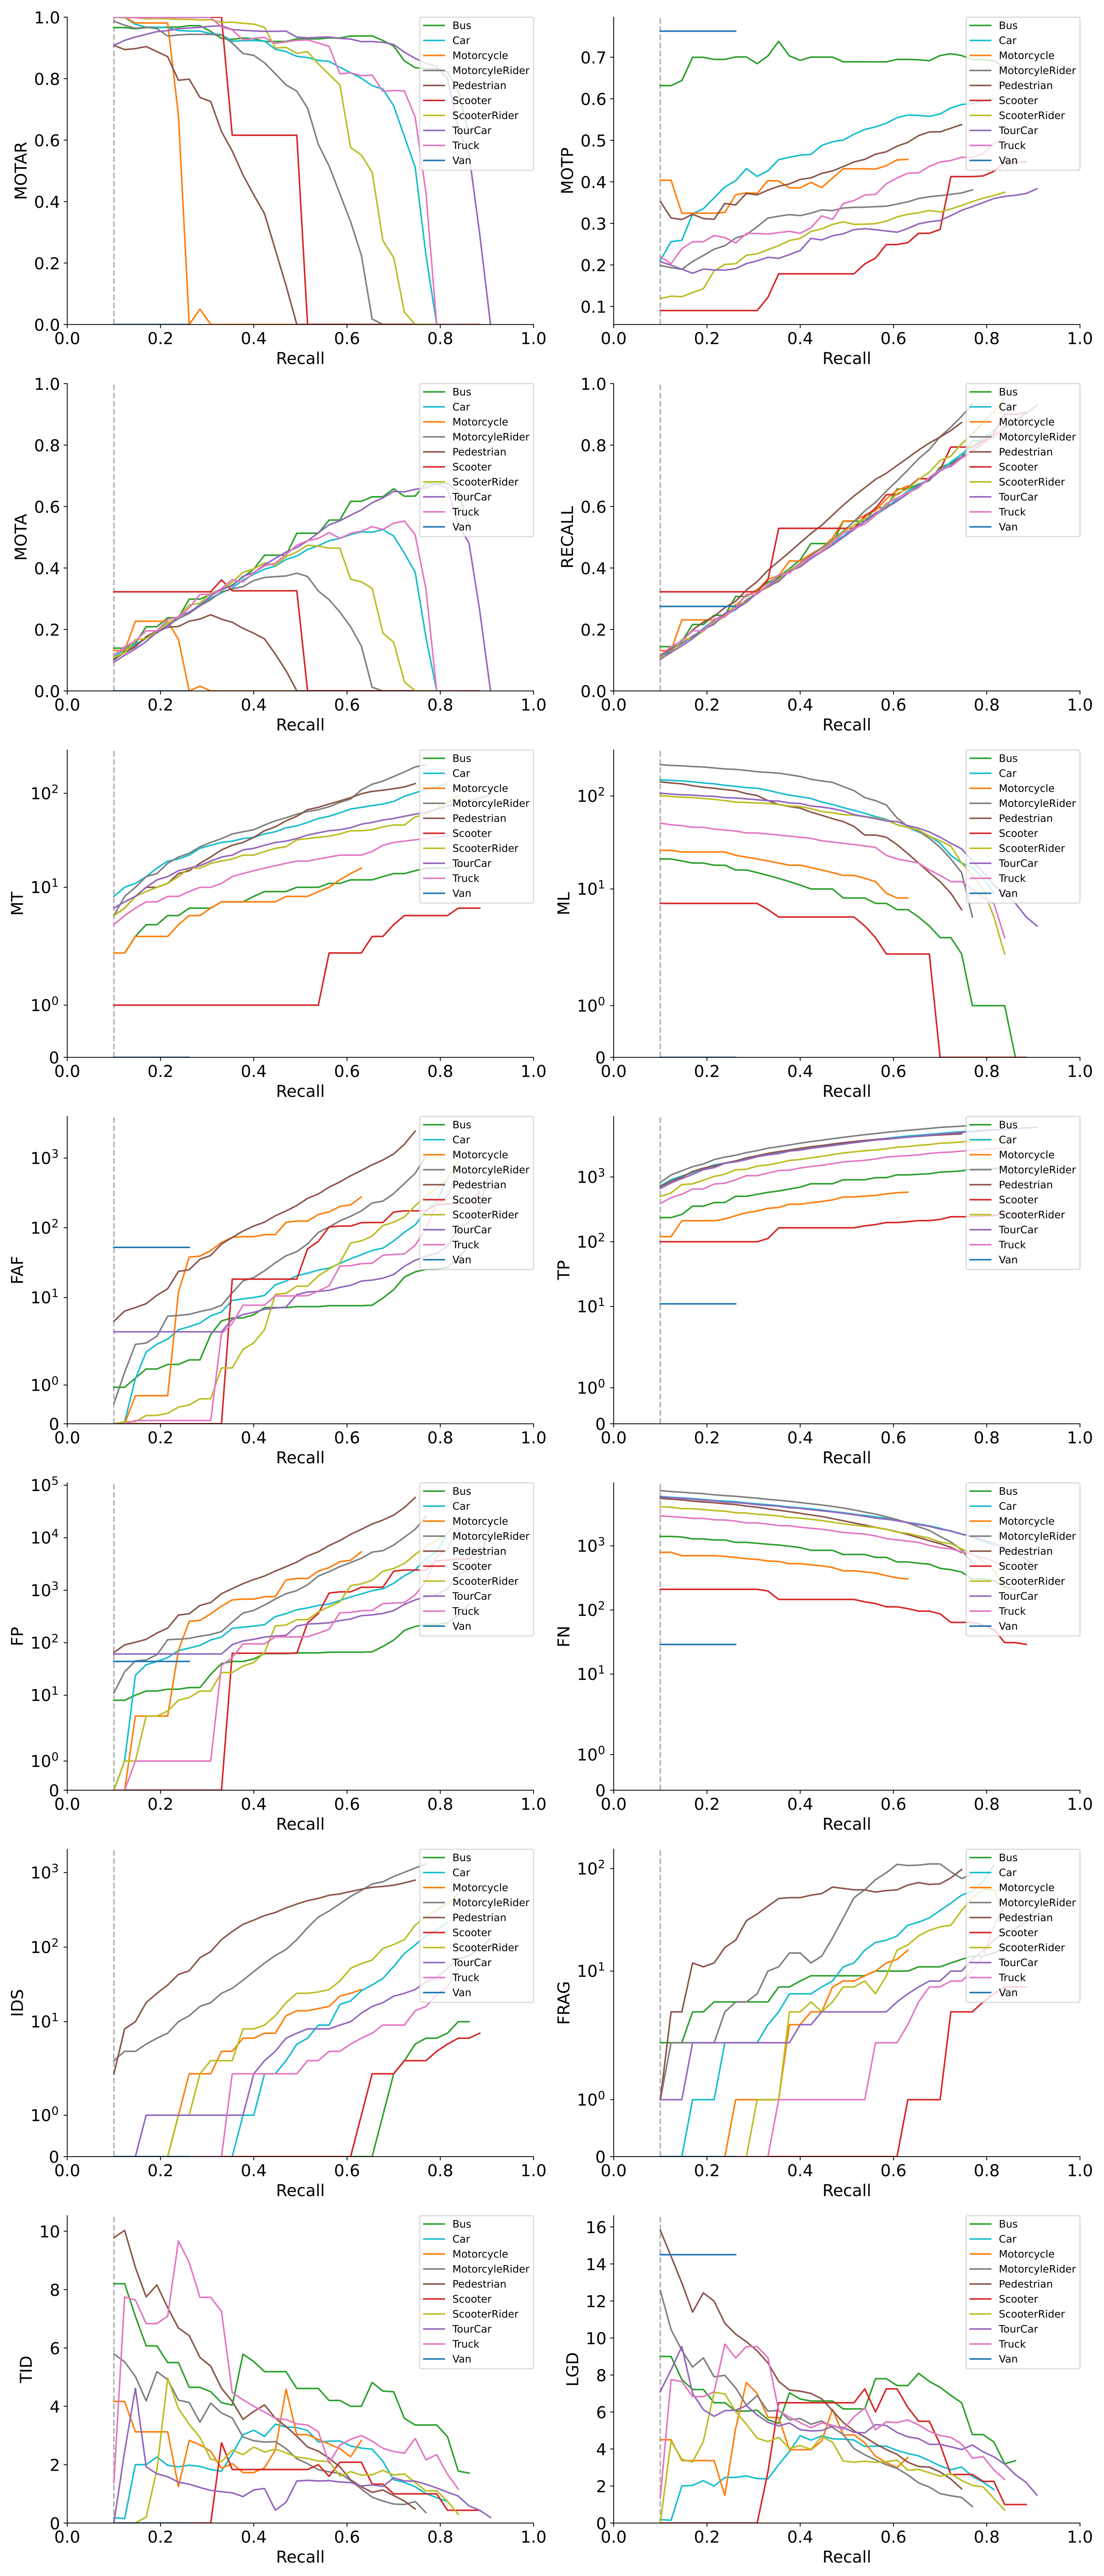

Supplement: Supplementary file 2 [file Dokania_IDD-3D_Indian_Driving_WACV_2023_supplemental.zip]

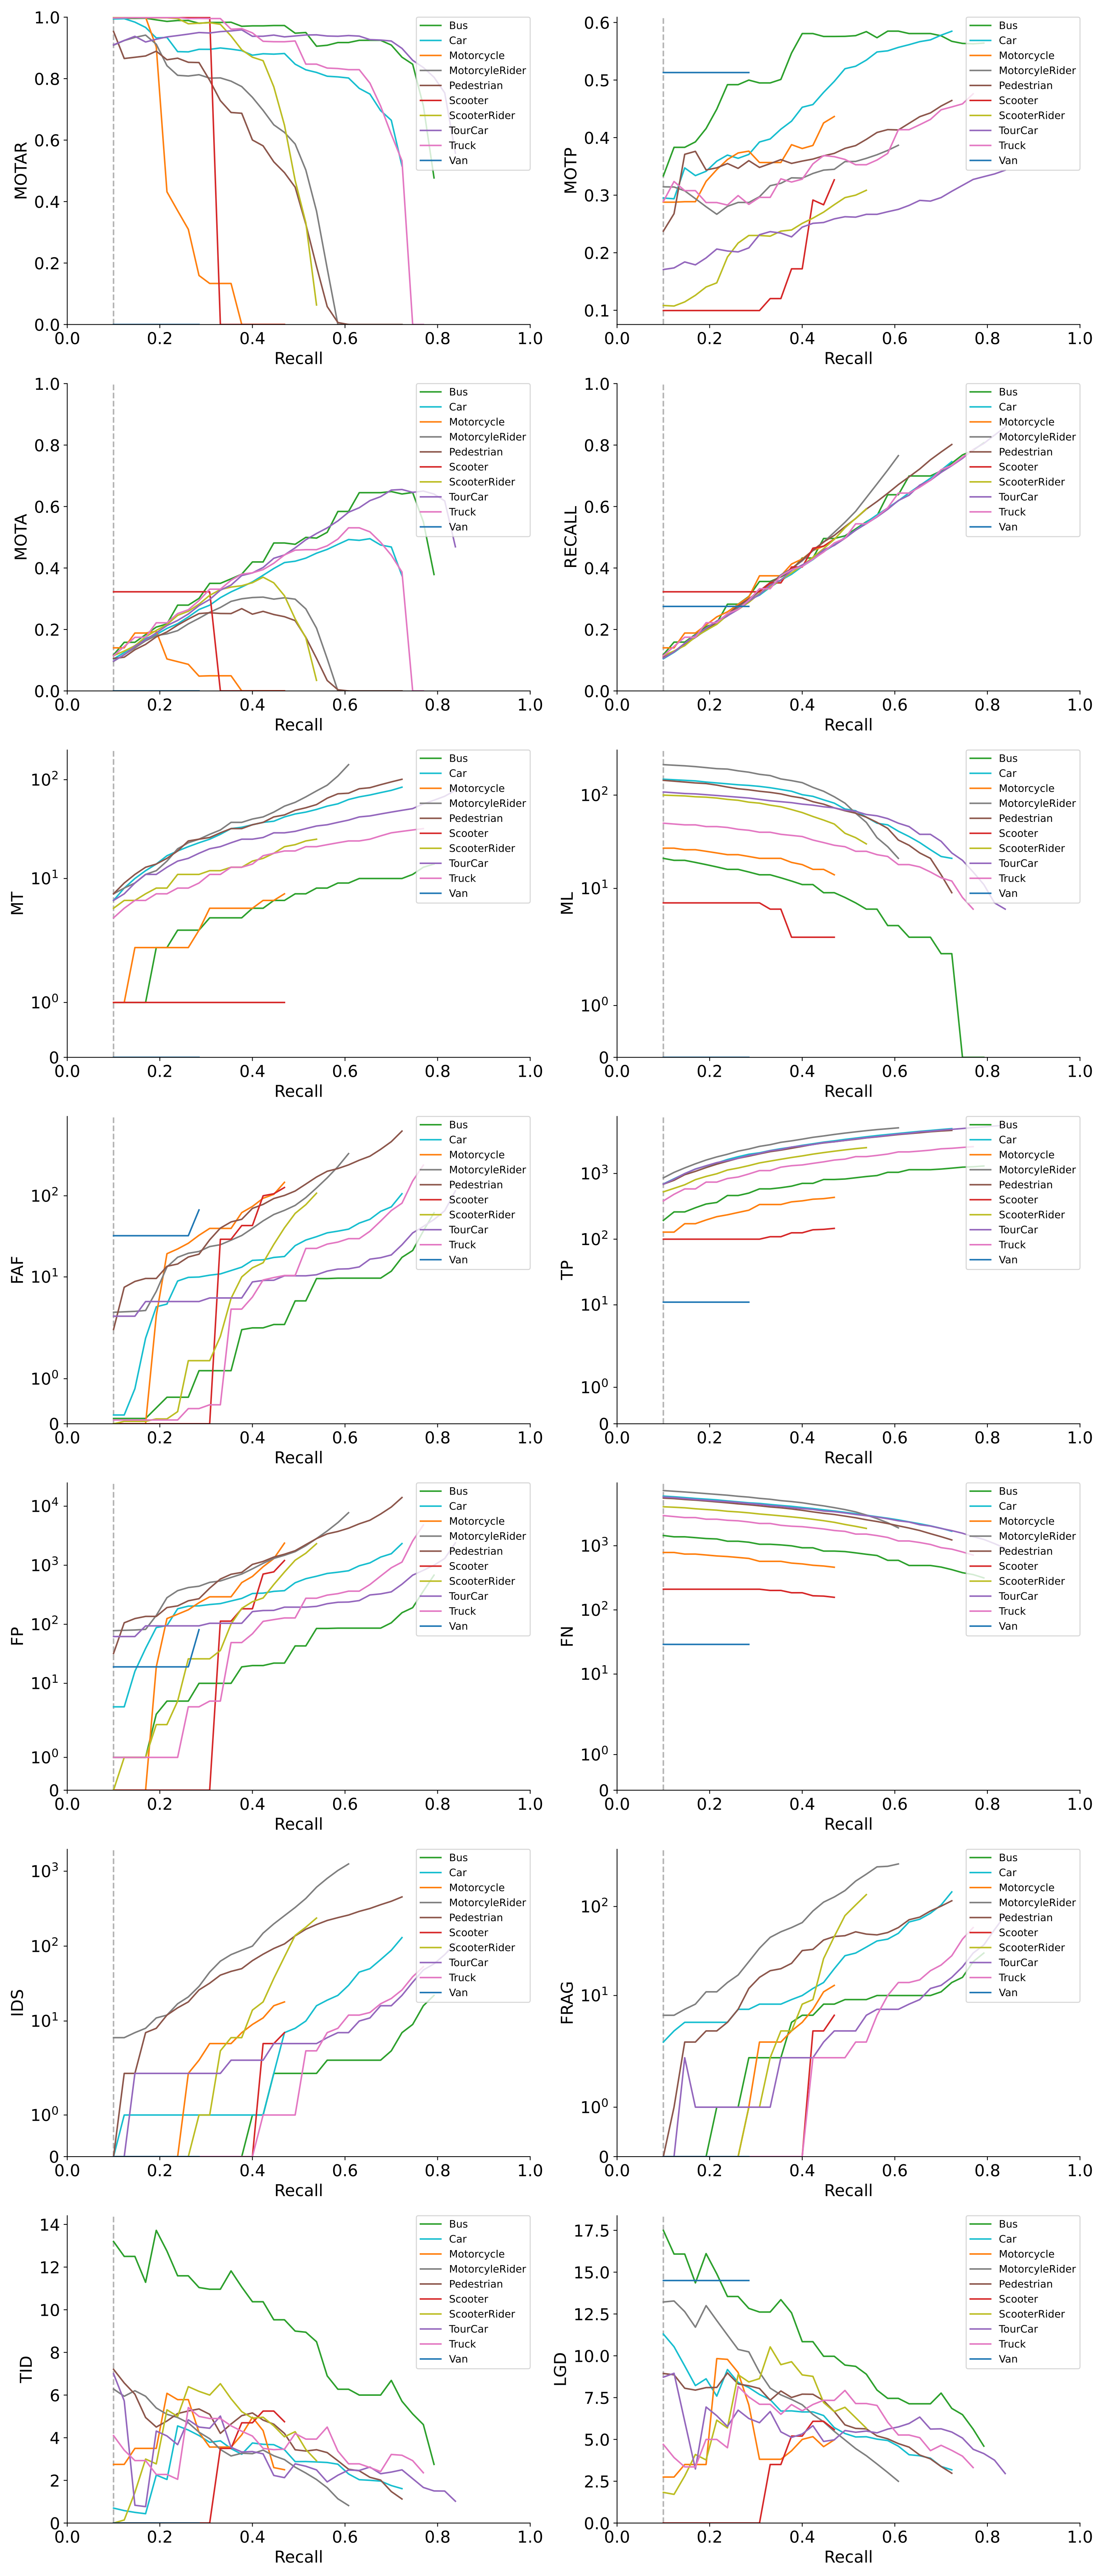

Supplement: Supplementary file 4 [file Dokania_IDD-3D_Indian_Driving_WACV_2023_supplemental.zip]

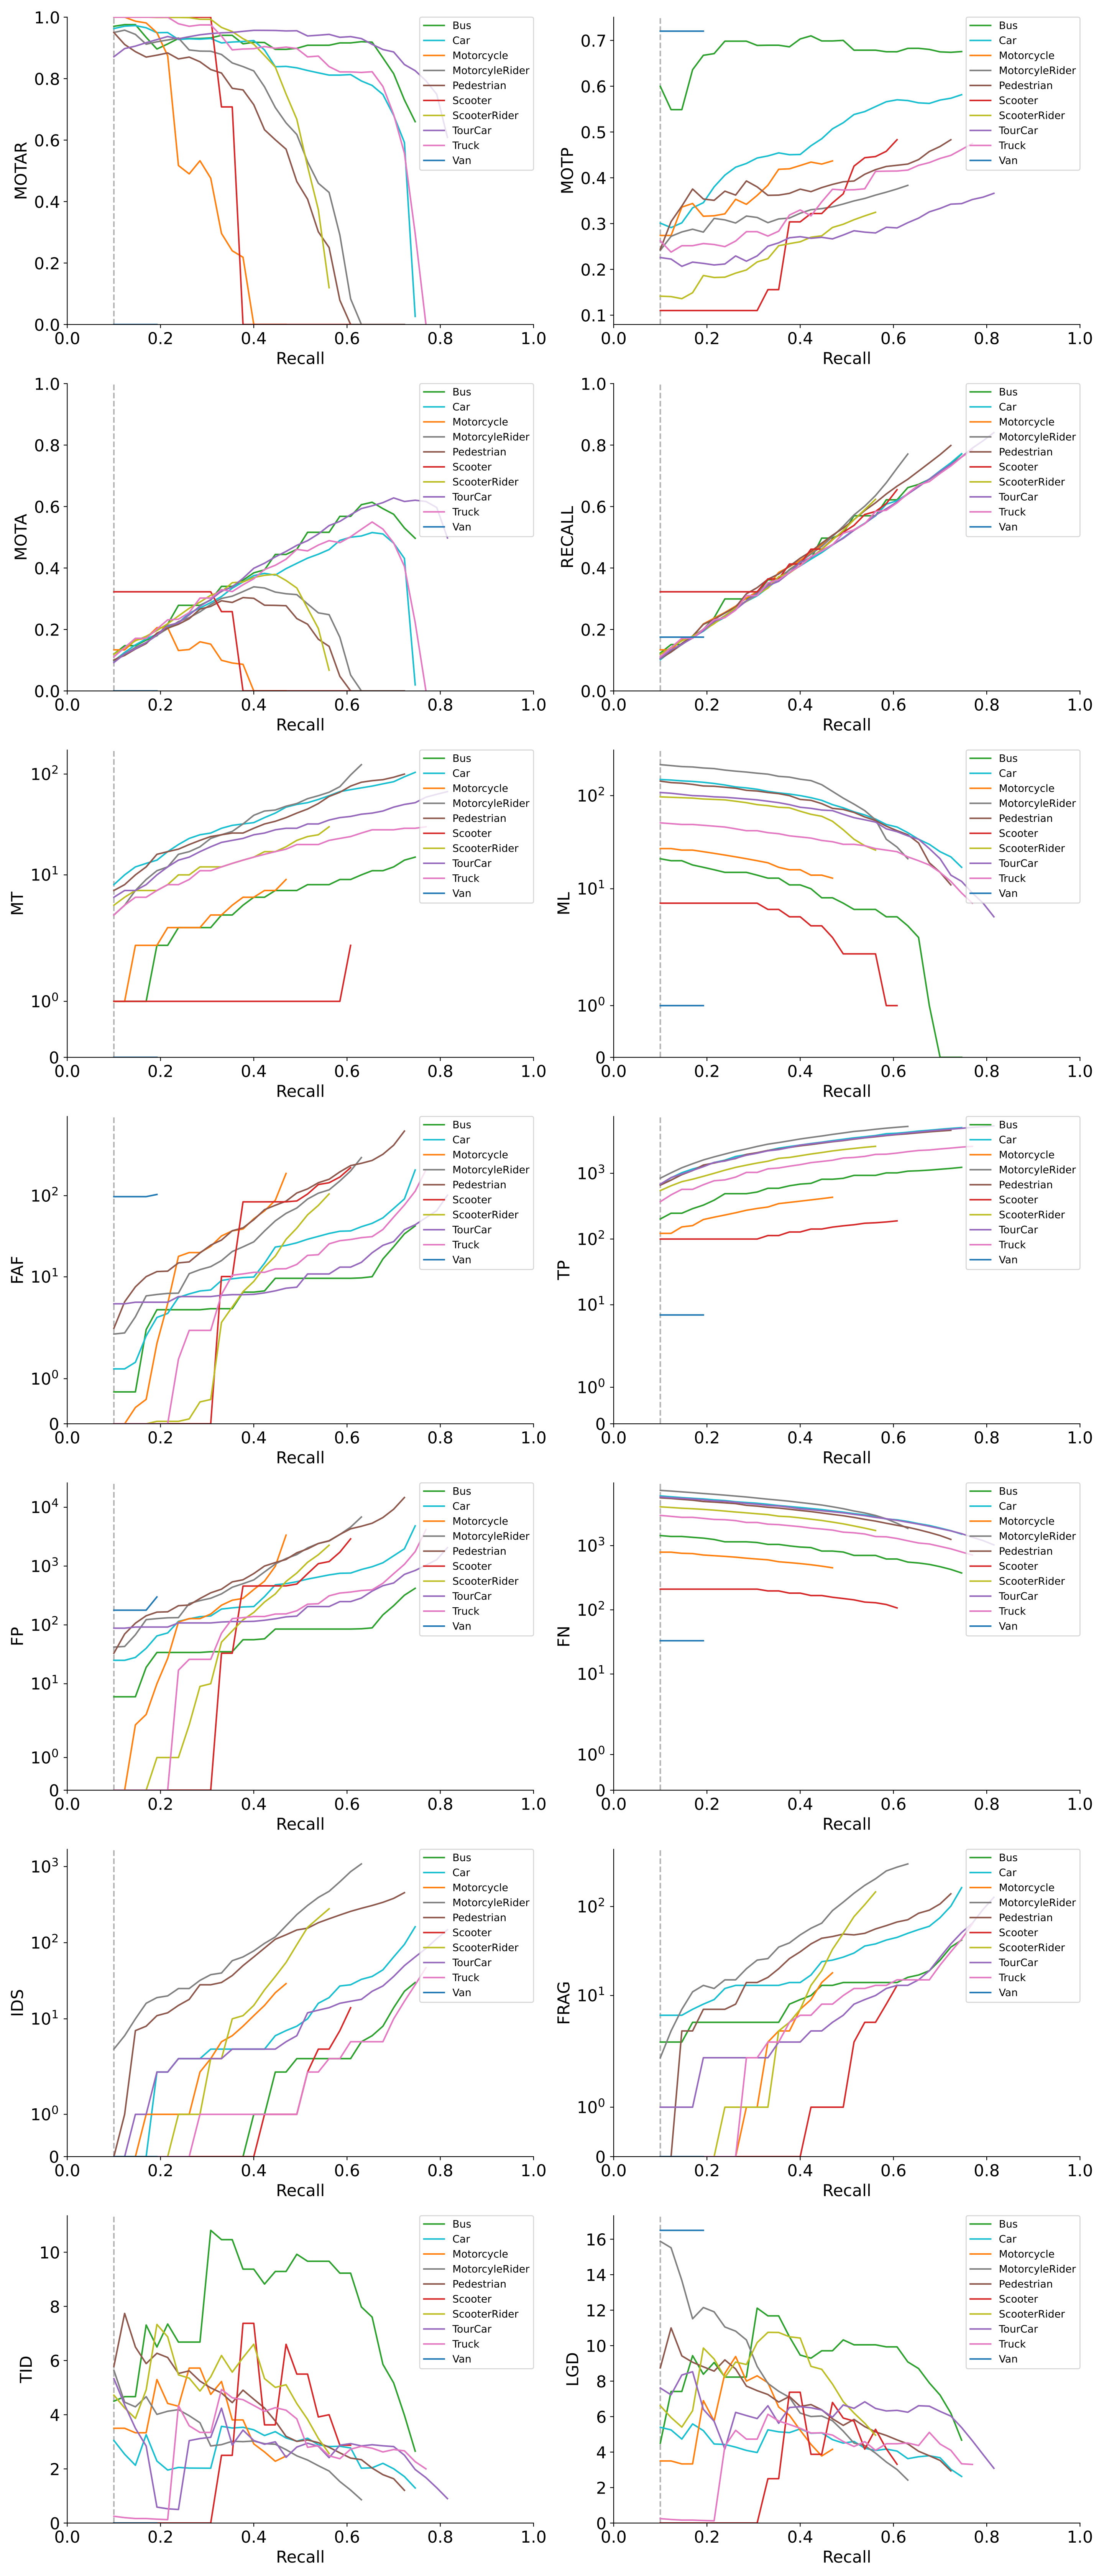

Supplement: Supplementary file 5 [file Dokania_IDD-3D_Indian_Driving_WACV_2023_supplemental.zip]

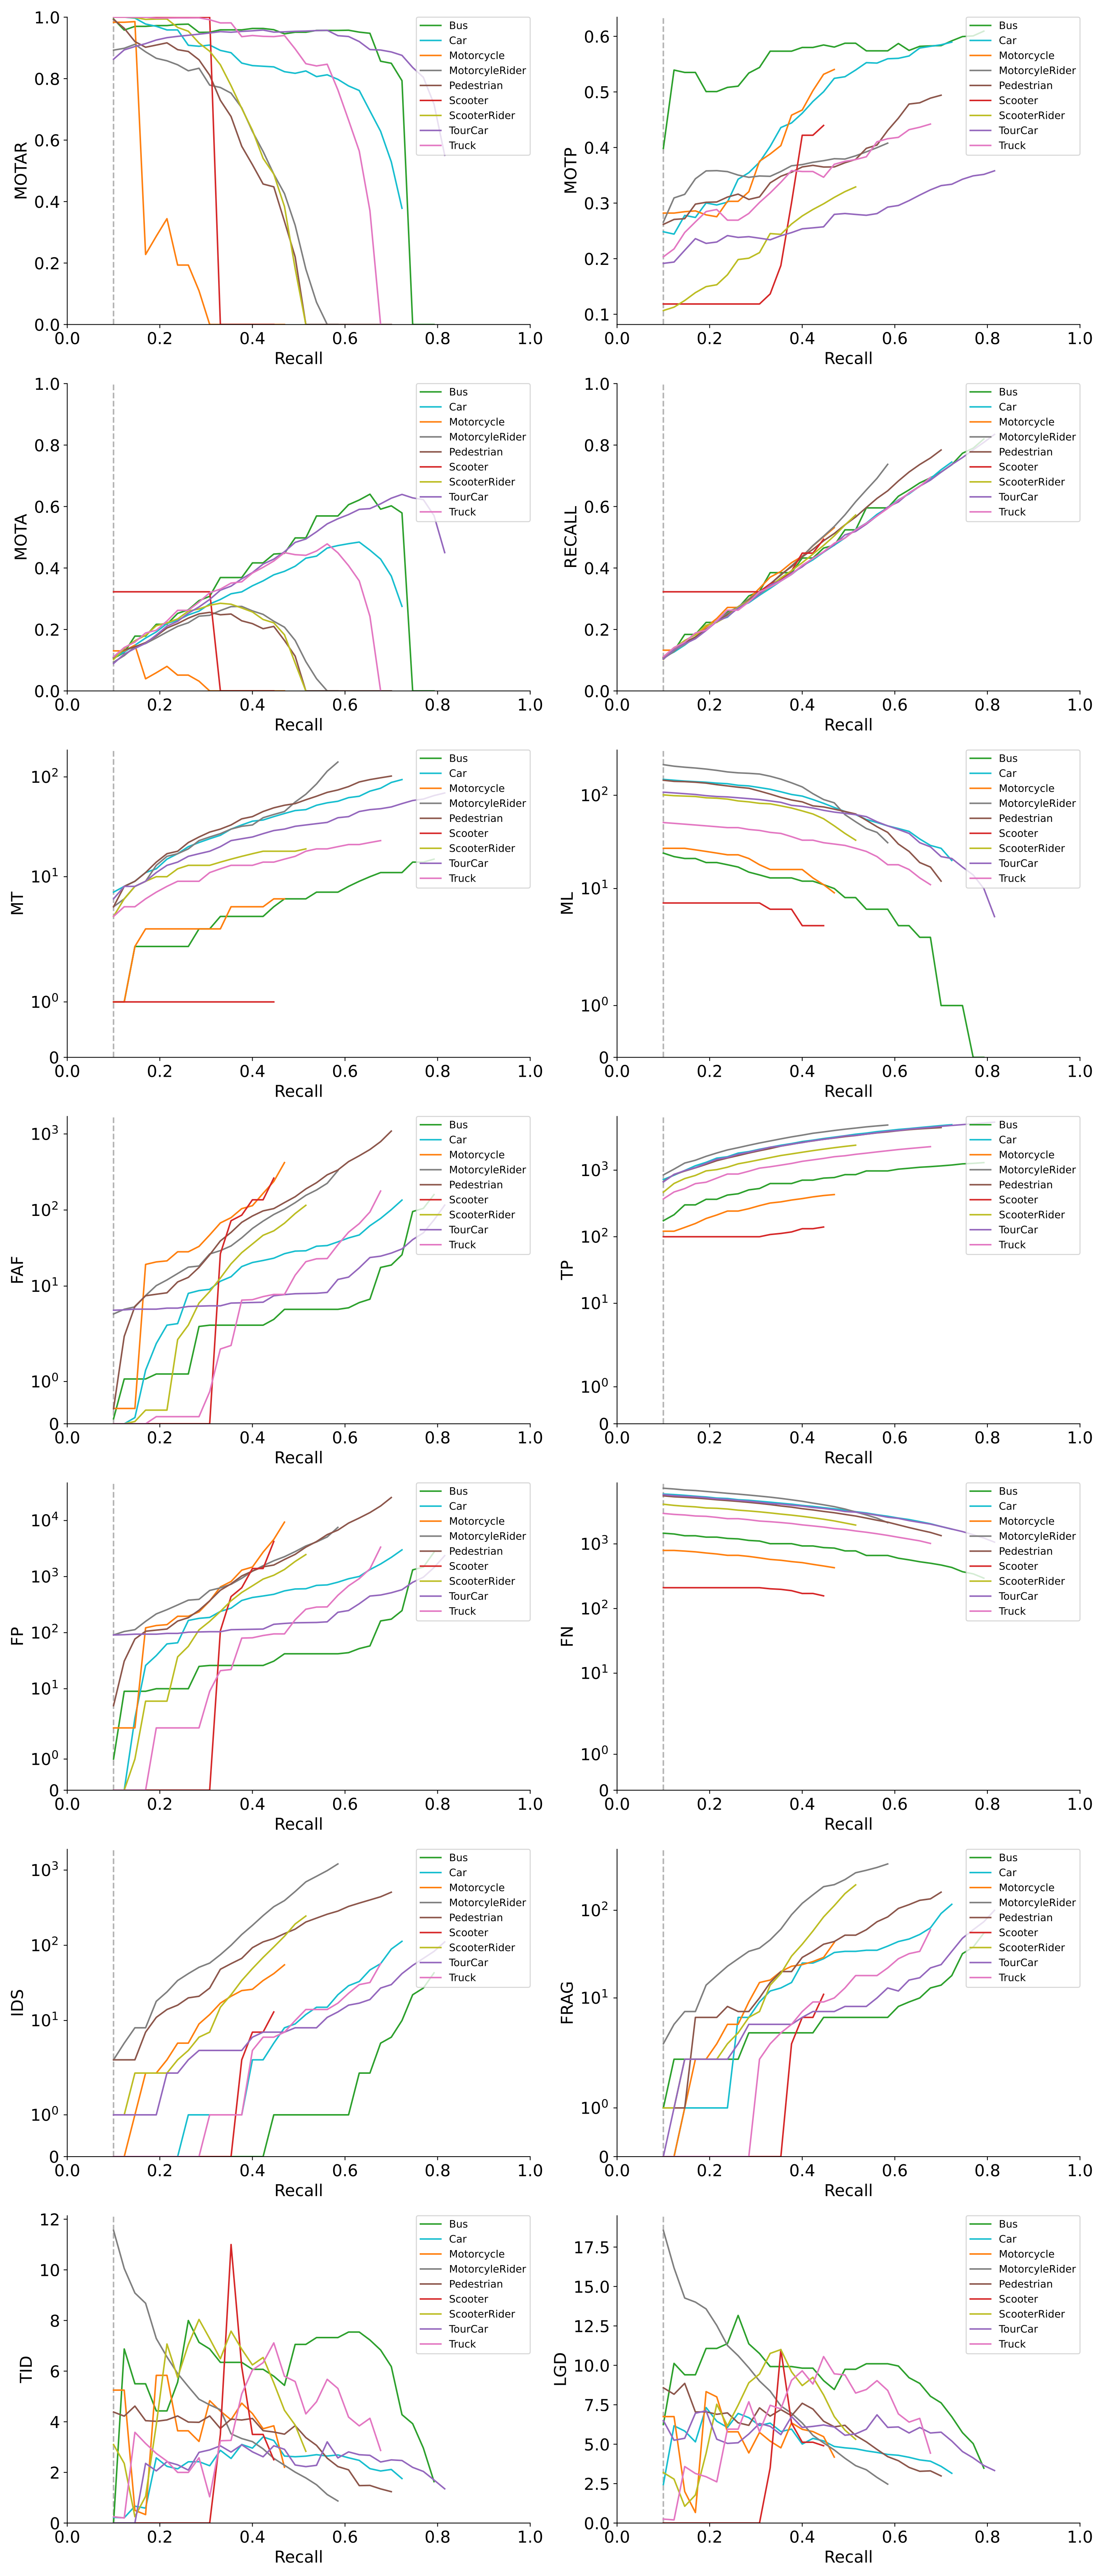

Supplement: Supplementary file 6 [file Dokania_IDD-3D_Indian_Driving_WACV_2023_supplemental.zip]
